# Supplementary material for: Altering cancer transcriptomes using epigenomic inhibitors
Source: PubMed Central journal article supplement (PMC4506402; doi:10.1186/1756-8935-8-9), 2015-02-24
Supplement: 13072_2014_359_MOESM10_ESM.pdf [file 13072_2014_359_MOESM10_ESM.pdf]

### PANC1 ICG-001 96hr

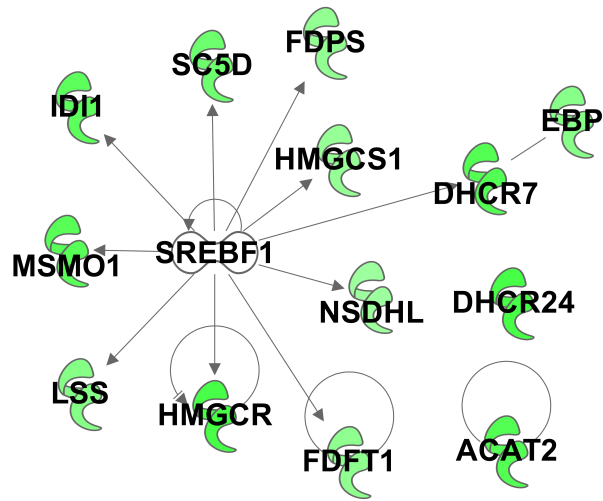

### Fold change

| Symbol | ICG-001 96hr | C646 96hr |
|--------|--------------|-----------|
| ACAT2  | -2.0         | 1.0       |
| DHCR24 | -2.1         | 1.3       |
| DHCR7  | -2.0         | 1.4       |
| EBP    | -1.4         | 1.6       |
| FDFT1  | -1.3         | 1.5       |
| FDPS   | -1.3         | 1.4       |
| HMGCR  | -2.1         | 1.2       |
| HMGCS1 | -1.2         | 1.4       |
| IDI1   | -1.9         | 1.2       |
| LSS    | -1.4         | 1.1       |
| MSMO1  | -1.9         | 1.3       |
| NSDHL  | -1.1         | 1.4       |

### PANC1 C646 96hr

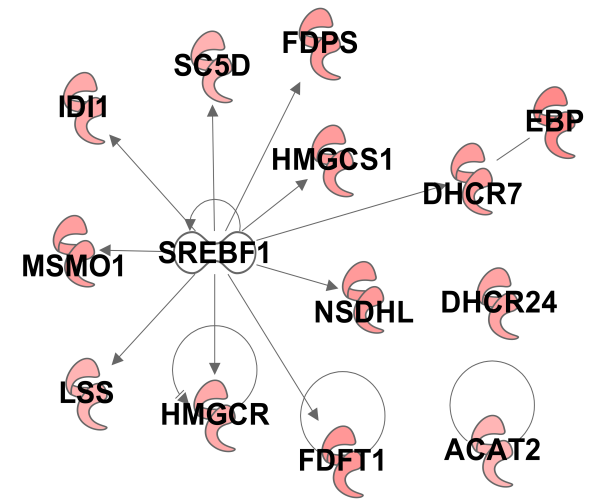

© 2000-2014 QIAGEN. All rights reserved.

© 2000-2014 QIAGEN. All rights reserved.

### Additional File 10: ICG-001 negatively regulates the cholesterol biosynthesis network.

IPA was used to show the relationships between SREBF1 and other genes involved in cholesterol biosynthesis that are affected by treatment of PANC1 cells with ICG-001 or C646. The arrows indicate direction interactions between the SREBF1 transcription factor and the other genes. Each of the indicated genes was down-regulated (indicated by the green color) by ICG-001 but up-regulated or unaffected by C646 (indicated by the red color); fold change for each gene is shown in the table.
